# Supplementary material
Source: HighWire-hosted journal article supplement (https://bmjopen.bmj.com/content/9/7/e029486)
Supplement: inline-supplementary-material-1 [file inline-supplementary-material-1.pdf]

## Appendix to: Accuracy of Patient Perceptions of Maternity Facility Quality and the Choice of Providers in Nairobi, Kenya: A Cohort Study

**Figure A1.** Flow chart of facility inclusion in the study (Adapted from Cohen et al 2017[1])

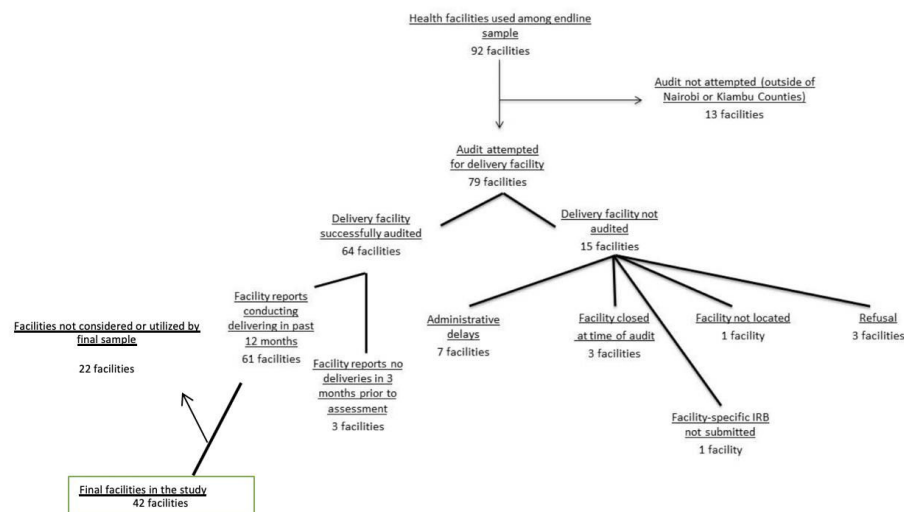

**Table A1. Fraction of facilities performing each item in the quality index (N=42)**

| <b>Quality Index Item</b>                                                          | <b>Percentage of Facilities Meeting Item</b> |
|------------------------------------------------------------------------------------|----------------------------------------------|
| <b>Reported practice in the past three months</b>                                  |                                              |
| 1. Removal of retained products of conception                                      | 73.8                                         |
| 2. Parenteral oxytocin for maternal hemorrhage                                     | 97.6                                         |
| 3. Parenteral anticonvulsants for (pre-)eclampsia                                  | 54.8                                         |
| 4. Manual removal of placenta                                                      | 69.1                                         |
| 5. Parenteral antibiotics for maternal infection                                   | 90.5                                         |
| 6. Assisted vaginal delivery (vacuum or forceps)                                   | 26.2                                         |
| 7. Caesarean section                                                               | 47.6                                         |
| 8. Blood transfusion                                                               | 40.5                                         |
| 9. Antibiotics given to mother for preterm labor or prolonged rupture of membranes | 73.8                                         |
| 10. Parenteral antibiotics for neonatal sepsis                                     | 66.7                                         |
| 11. Corticosteroids given to mother for preterm labor                              | 47.6                                         |
| 12. Newborn resuscitation (with bag and mask)                                      | 81.0                                         |
| 13. Kangaroo Mother Care practiced for premature/very small newborns               | 64.3                                         |
| 14. Alternative Feeding for newborns unable to breastfeed                          | 64.3                                         |
| 15. PMTCT if mother is HIV-positive                                                | 71.4                                         |
| 16. IV fluids given to newborn                                                     | 47.6                                         |
| 17. Safe administration of oxygen to newborn                                       | 71.4                                         |
| <b>Verified presence of</b>                                                        |                                              |
| 18. At least one medical officer present 24 hours 7 days a week                    | 85.7                                         |
| 19. Essential medical supplies and equipment for medical complications †           | 52.4                                         |

Notes †. Medical equipment and supplies include syringes and needles, injectable oxytocic, IV infusion set, suture material with needle, injectable anticonvulsant and injectable antibiotics.

**Table A2. Characteristics of study sample (N= 180) compared to original (full study) baseline sample (N=553)**

| Mean/percentage (se)                                        | Study sample<br>(N= 180) | Original Study Baseline<br>Sample (N = 553) | Test of<br>equality.<br>p-value on<br>F-test that<br>1=2 |
|-------------------------------------------------------------|--------------------------|---------------------------------------------|----------------------------------------------------------|
|                                                             | (1)                      | (2)                                         | (3)                                                      |
| Mean age, years                                             | 25.34 (4.73)             | 25.27 (4.53)                                | 0.87                                                     |
| Married                                                     | 85.56 (0.35)             | 88.43 (0.32)                                | 0.31                                                     |
| Any Secondary Education                                     | 65.56 (0.48)             | 67.09 (0.47)                                | 0.70                                                     |
| Electricity in household                                    | 98.89 (0.24)             | 92.39 (0.27)                                | 0.50                                                     |
| Difficult to get 1000 Ksh †                                 | 60.00 (0.49)             | 59.60 (0.49)                                | 0.92                                                     |
| Health Insurance                                            | 38.33 (0.49)             | 40.65 (0.49)                                | 0.41                                                     |
| First pregnancy                                             | 31.67 (0.47)             | 33.82 (0.47)                                | 0.62                                                     |
| Previous C-section (among those<br>with previous birth)     | 9.83 (0.30)              | 12.39 (0.33)                                | 0.45                                                     |
| People with whom delivery location<br>was discussed, number | 0.54 (0.76)              | 0.42 (0.72)                                 | 0.06                                                     |
| Informed to have a high-risk<br>pregnancy                   | 8.33 (0.38)              | 6.15 (0.24)                                 | 0.31                                                     |

Notes. † Amount converted from Kenyan Shillings (1000) to US Dollars using April 2017 conversion rate of 0.0097.

**Table A3. Association between perception accuracy and the probability/odds of delivery in a facility in each quartile of the quality distribution (multivariate ordinary least square and logistic regressions; N=180)**

| Dependent Variable Is a Binary Variable Indicating:  |               |         |                                       |               |         |                                      |               |         |                                    |              |         |
|------------------------------------------------------|---------------|---------|---------------------------------------|---------------|---------|--------------------------------------|---------------|---------|------------------------------------|--------------|---------|
| Delivered in Bottom Quartile Facility                |               |         | Delivered in Second Quartile Facility |               |         | Delivered in Third Quartile Facility |               |         | Delivered in Top Quartile Facility |              |         |
| Estimate or Odds Ratio                               | 95 % CI       | p-value | Estimate or Odds Ratio                | 95 % CI       | p-value | Estimate or Odds Ratio (se)          | 95 % CI       | p-value | Estimate or Odds Ratio (se)        | 95 % CI      | p-value |
| <b>Ordinary least square regression (unadjusted)</b> |               |         |                                       |               |         |                                      |               |         |                                    |              |         |
| -0.082                                               | -0.211, 0.047 | 0.211   | -0.030                                | -0.157, 0.098 | 0.647   | -0.045                               | -0.183, 0.092 | 0.516   | 0.157**                            | 0.041, 0.273 | 0.008   |
| <b>Ordinary least square regression (adjusted)</b>   |               |         |                                       |               |         |                                      |               |         |                                    |              |         |
| -0.070                                               | -0.218, 0.079 | 0.358   | -0.039                                | -0.173, 0.116 | 0.599   | -.036                                | -0.196, 0.124 | 0.659   | 0.145*                             | 0.029, 0.260 | 0.015   |
| <b>Logistic regression (unadjusted)</b>              |               |         |                                       |               |         |                                      |               |         |                                    |              |         |
| 0.649                                                | 0.327, 1.288  | 0.216   | 0.851                                 | 0.427, 1.696  | 0.647   | 0.809                                | 0.428, 1.531  | 0.515   | 2.962**                            | 1.330, 6.597 | 0.008   |
| <b>Logistic regression (adjusted)</b>                |               |         |                                       |               |         |                                      |               |         |                                    |              |         |
| 0.737                                                | 0.311, 1.748  | 0.489   | 0.854                                 | 0.358, 2.038  | 0.721   | 0.835                                | 0.379, 1.838  | 0.654   | 4.39*                              | 1.302, 14.77 | 0.017   |

Notes. Each specification is a regression of a binary outcome indicating delivery in a facility within the specific quality quartile on the perception accuracy variable. There are four of these regressions, one for each quartile of the quality distribution. Adjusted regressions include the following covariates: Marital status, educational attainment, choice set size, ANC visits more than 4, previous pregnancy, C-section history, insurance status, information about risk in pregnancy, SES status, treatment arm, gestational month at baseline and neighborhood group.

\* p < 0.05; \*\* p < 0.01; \*\*\* p < 0.001

**Table A4. Sensitivity Analysis: Association between Perception Accuracy and an Alternative Measure of Facility Quality (OLS Regression)**

|                                    | Unadjusted |               |         | Adjusted |              |         |
|------------------------------------|------------|---------------|---------|----------|--------------|---------|
|                                    | Estimate   | 95 % CI       | p-value | Estimate | 95 % CI      | p-value |
| Outcome: BEmONC Count <sup>1</sup> | 0.525      | -0.007, 1.057 | 0.053   | 0.570*   | 0.043, 1.098 | 0.034   |

Notes. Models are ordinary least squares regressions. Adjusted regressions include: Marital status, educational attainment, choice set size, previous pregnancy, C-section history, insurance status, information about risk in pregnancy, ANC visits more than 4, SES status, treatment arm, gestational month at baseline, and neighborhood group.

1 BEmONC Count is the number of (out of 7) signal functions that the facility meets [2]. These functions are detailed in items 1-6 and 12 in Table A1.

\* p <0.05; \*\* p< 0.01 ; \*\*\* p< 0.001

**Table A5. Sensitivity Analysis: Association between a Lenient Definition of Accurate Perceptions and Facility Quality Index (N=180)**

| Unadjusted |              |         | Adjusted |              |         |
|------------|--------------|---------|----------|--------------|---------|
| Estimate   | 95 % CI      | p-value | Estimate | 95 % CI      | p-value |
| 0.096**    | 0.030, 0.161 | 0.005   | 0.090**  | 0.023, 0.156 | 0.009   |

Notes. These specifications consider a version of the “accurate perceptions” variable in which women were considered accurate if they either were exactly correct or if they were incorrect in their ranking of facilities that had equal index values (ranked one as better than the other). Specifications are ordinary least squares regressions. Adjusted regressions include the following covariates as midline: Marital status, educational attainment, choice set size, previous pregnancy, C-section history, ANC visits more than 4, insurance status, information about risk in pregnancy, SES status, treatment arm, gestational month at baseline, and neighborhood group.  
\* p <0.05; \*\* p< 0.01 ; \*\*\* p< 0.001

**References**

[1] Cohen J, Rothschild C, Golub G et al. Measuring the Impact of Cash Transfers And Behavioral ‘Nudges’ On Maternity Care In Nairobi, Kenya. *Health Affairs* 2017. 36(11): 1956-1964.

[2] Otolorin E, Gomez P, Currie S, et al. Essential basic and emergency obstetric and newborn care: From education and training to service delivery and quality of care. *International Journal of Gynecology & Obstetrics* 2015; 130(2): S46-S53.
